# Supplementary material for: U.S. Pacific coastal wetland resilience and vulnerability to sea-level rise
Source: PubMed Central journal article supplement — Sci Adv. 2018 Feb 21;4(2):eaao3270. doi: 10.1126/sciadv.aao3270 (PMC5834000; doi:10.1126/sciadv.aao3270), 2018-02-21
Supplement: aao3270_SM.pdf [file aao3270_SM.pdf]

## Supplementary Materials for

### U.S. Pacific coastal wetland resilience and vulnerability to sea-level rise

Karen Thorne, Glen MacDonald, Glenn Guntenspergen, Richard Ambrose, Kevin Buffington, Bruce Dugger, Chase Freeman, Christopher Janousek, Lauren Brown, Jordan Rosencranz, James Holmquist, John Smol, Kathryn Hargan, John Takekawa

Published 21 February 2018, *Sci. Adv.* **4**, eaao3270 (2018)  
DOI: 10.1126/sciadv.aao3270

#### This PDF file includes:

- fig. S1. Available transgression or migration space under high SLR scenarios for the study sites.
- fig. S2. Projections of future sea level used in the WARMER modeling for high, moderate, and low SLR scenarios, from the National Research Council (6).
- fig. S3.  $^{137}\text{Cs}$  activity (in becquerel per kilogram) shown by depth with mean  $\pm$  SE for sediment cores taken from sites in Southern California.
- table S1. Core elevation (in centimeters; relative to MSL) and accretion rate (in millimeters per year) for soil cores used in WARMER modeling.
- table S2. Sample size, mean elevation, and elevation range of real-time kinematic GPS (in meters; NAVD88) points collected at all study sites.
- table S3. Equilibrium elevations from WARMER.
- table S4. Elevation range of low, middle, and high marsh zones at each site.
- table S5. List of sediment cores taken from California, with locations, elevations, and estimated sediment accretion rate from  $^{137}\text{Cs}$  dating.
- table S6. WARMER model parameters for Pacific Northwest study sites.
- table S7. WARMER parameters for California study sites.

**Supplemental Figures & Tables:**

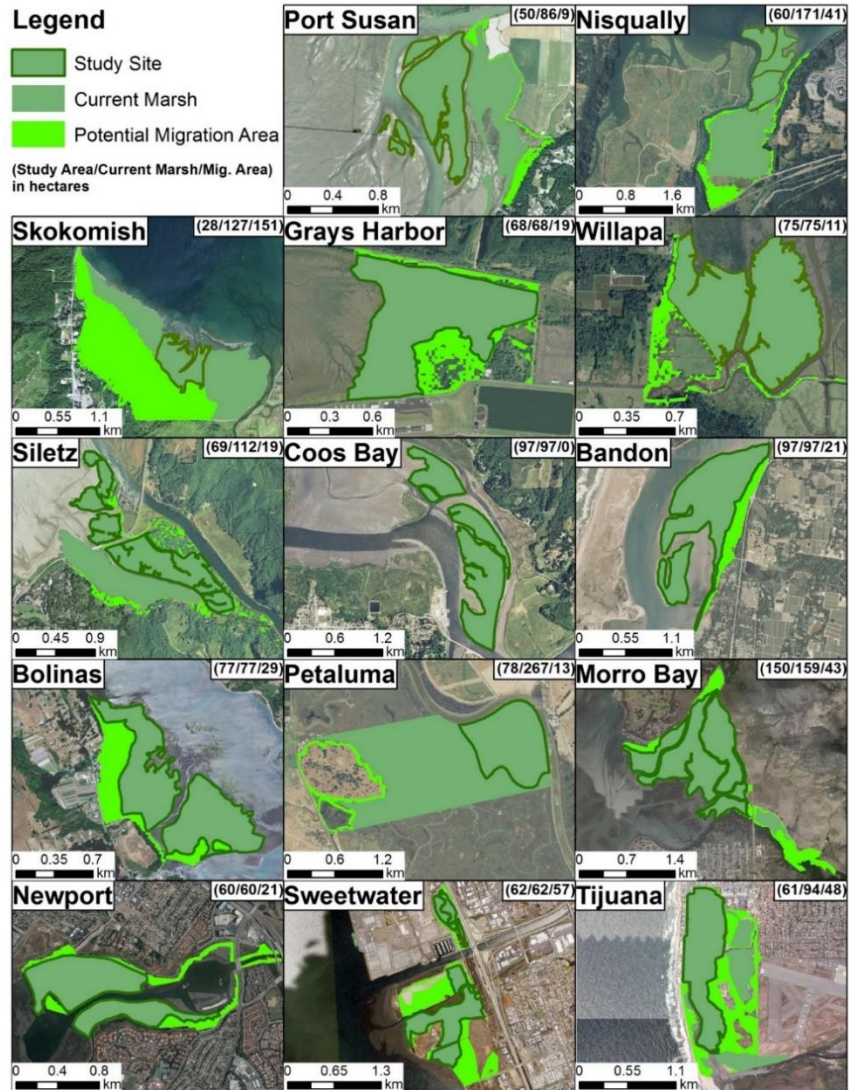

**fig. S1. Available transgression or migration space under high SLR scenarios for the study sites.** Study area and current marsh are compared to the relative area of migration space available in parenthesis (Study Area/Current Marsh/Mig. Area) in hectares. Most study sites in the Pacific Northwest are constrained by steep topography which consists of temperate forests, while most study sites in California are constrained by human development.

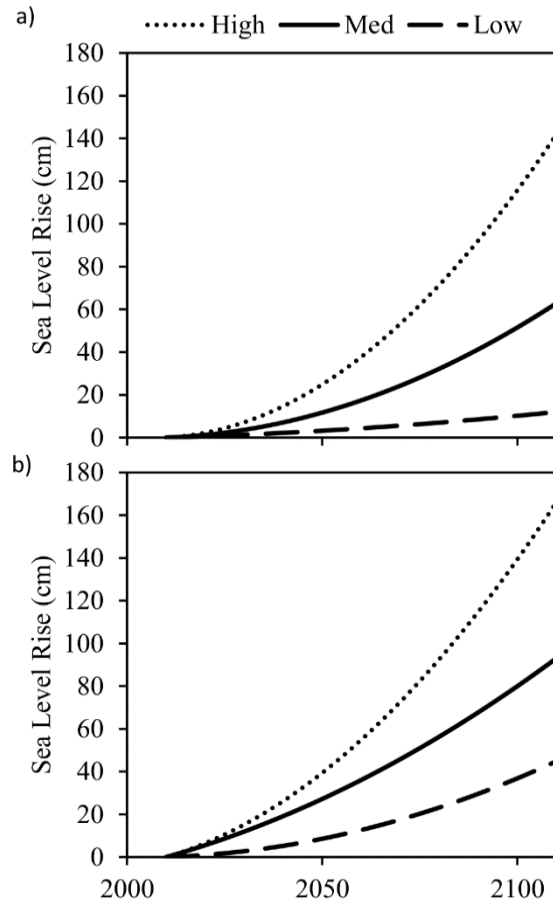

**fig. S2. Projections of future sea level used in the WARMER modeling for high, moderate, and low SLR scenarios, from the National Research Council, *Sea-Level Rise for the Coasts of California, Oregon, and Washington: Past, Present, and Future* (6). Sea-level rise curves for sites in the Pacific Northwest (a) and California (b).**

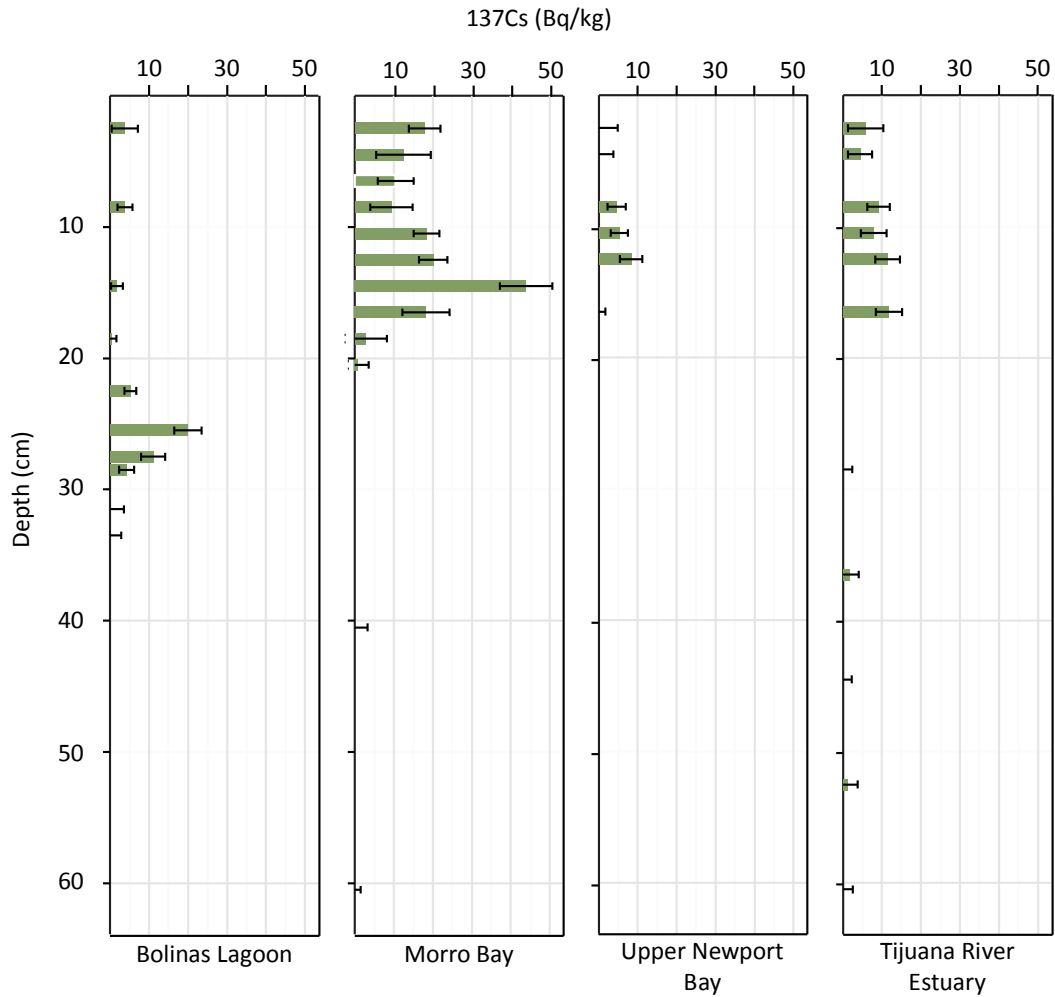

**fig. S3.** <sup>137</sup>Cs activity (in becquerel per kilogram) shown by depth with mean ± SE for sediment cores taken from sites in Southern California. Maximums of <sup>137</sup>Cs activity were used as a marker for the year 1963 to calculate vertical accretion rates.

**table S1. Core elevation (in centimeters; relative to MSL) and accretion rate (in millimeters per year) for soil cores used in WARMER modeling.**

| <b>Site</b>         | <b>Core Elevation<br/>(cm, MSL)</b> | <b>Accretion Rate<br/>(mm yr<sup>-1</sup>)</b> | <b>Source</b>   |
|---------------------|-------------------------------------|------------------------------------------------|-----------------|
| <b>Port Susan</b>   | 111                                 | 7.2                                            | Buffington 2017 |
| <b>Port Susan</b>   | 145                                 | 5.2                                            | Buffington 2017 |
| <b>Nisqually</b>    | 121                                 | 3.6                                            | Buffington 2017 |
| <b>Nisqually</b>    | 150                                 | 3.4                                            | Buffington 2017 |
| <b>Nisqually</b>    | 182                                 | 2.8                                            | Buffington 2017 |
| <b>Skokomish</b>    | 79                                  | 2.8                                            | Buffington 2017 |
| <b>Skokomish</b>    | 145                                 | 1.6                                            | Buffington 2017 |
| <b>Grays Harbor</b> | 49                                  | 8.2                                            | Buffington 2017 |
| <b>Grays Harbor</b> | 143                                 | 8.0                                            | Buffington 2017 |
| <b>Grays Harbor</b> | 116                                 | 7.4                                            | Buffington 2017 |
| <b>Willapa</b>      | 126                                 | 6.4                                            | Buffington 2017 |
| <b>Willapa</b>      | 198                                 | 6.0                                            | Buffington 2017 |
| <b>Siletz</b>       | 107                                 | 4.4                                            | Buffington 2017 |
| <b>Siletz</b>       | 124                                 | 3.6                                            | Buffington 2017 |
| <b>Siletz</b>       | 136                                 | 2.0                                            | Buffington 2017 |
| <b>Coos Bay</b>     | 116                                 | 3.2                                            | Buffington 2017 |
| <b>Coos Bay</b>     | 84                                  | 3.2                                            | Buffington 2017 |
| <b>Coos Bay</b>     | 134                                 | 3.4                                            | Buffington 2017 |
| <b>Bandon</b>       | 46                                  | 2                                              | Buffington 2017 |
| <b>Bandon</b>       | 105                                 | 2.4                                            | Buffington 2017 |
| <b>Bandon</b>       | 106                                 | 2.4                                            | Buffington 2017 |

|                   |    |      |                      |
|-------------------|----|------|----------------------|
| <b>Bolinas</b>    | 61 | 4.1  | Bryne et al. 2006    |
| <b>Bolinas</b>    | 80 | 4.9  | This study           |
| <b>Petaluma</b>   | 79 | 2    | Callaway et al. 2012 |
| <b>Petaluma</b>   | 75 | 2    | Callaway et al. 2012 |
| <b>Petaluma</b>   | 89 | 3.4  | Callaway et al. 2012 |
| <b>Morro Bay</b>  | 52 | 2.9  | This study           |
| <b>Newport</b>    | 75 | 2.6  | This study           |
| <b>Sweetwater</b> | 70 | 1.3  | Thorne et al. 2016   |
| <b>Sweetwater</b> | 85 | 1.7  | Thorne et al. 2016   |
| <b>Tijuana</b>    | 59 | 3.3  | This study           |
| <b>Tijuana</b>    | 61 | 8.3  | Weis et al. 2001     |
| <b>Tijuana</b>    | 68 | 9.4  | Weis et al. 2001     |
| <b>Tijuana</b>    | 57 | 10.6 | Weis et al. 2001     |
| <b>Tijuana</b>    | 59 | 7.1  | Weis et al. 2001     |
| <b>Tijuana</b>    | 63 | 9.4  | Weis et al. 2001     |

**table S2. Sample size, mean elevation, and elevation range of real-time kinematic GPS (in meters; NAVD88) points collected at all study sites.**

| <b>Site</b>  | <b>Area (ha)</b> | <b>Elevation data points (n)</b> | <b>Mean elevation (m)</b> | <b>Maximum elevation (m)</b> | <b>Minimum elevation (m)</b> | <b>Elevation range (m)</b> |
|--------------|------------------|----------------------------------|---------------------------|------------------------------|------------------------------|----------------------------|
| Port Susan   | 51.5             | 897                              | 2.23                      | 3.46                         | 1.28                         | 2.18                       |
| Nisqually    | 59.9             | 1072                             | 2.77                      | 3.16                         | 2.26                         | 0.9                        |
| Skokomish    | 28.8             | 605                              | 2.66                      | 4.08                         | 1.48                         | 2.6                        |
| Grays Harbor | 67.8             | 1192                             | 2.42                      | 2.58                         | 1.45                         | 1.13                       |
| Willapa      | 74.8             | 1230                             | 2.42                      | 3.23                         | 1.72                         | 1.51                       |
| Siletz       | 69.2             | 1196                             | 2.3.5                     | 2.75                         | 1.74                         | 1.01                       |
| Coos Bay     | 97.2             | 1605                             | 2.04                      | 2.58                         | 1.45                         | 1.13                       |
| Bandon       | 96.7             | 1710                             | 2.03                      | 3.01                         | 1.38                         | 1.63                       |
| Bolinas      | 83.7             | 1622                             | 1.62                      | 2.63                         | 1.2                          | 1.43                       |
| Petaluma     | 80.6             | 655                              | 1.82                      | 2.28                         | 0.87                         | 1.41                       |
| Morro Bay    | 150.3            | 2575                             | 1.63                      | 2.82                         | 1.03                         | 1.79                       |
| Newport      | 59.8             | 1037                             | 1.55                      | 2.81                         | 0.81                         | 2                          |
| Sweetwater   | 128              | 1201                             | 1.63                      | 2.74                         | 0.83                         | 1.91                       |
| Tijuana      | 61.7             | 989                              | 1.56                      | 2.58                         | 1.17                         | 1.41                       |

**table S3. Equilibrium elevations from WARMER.** Elevation ( $z^*$ ) at which WARMER predicts a stable marsh platform for each study site under the historic sea-level rise rate. Four sites, Skokomish, Petaluma, Newport, and Sweetwater, were not stable under rates of historic sea-level rise, indicating that the measured accretion rates at those sites are too low to maintain a marsh platform.

| Site         | Equilibrium ( $z^*$ ) |
|--------------|-----------------------|
| Port Susan   | 1.04                  |
| Nisqually    | 1.57                  |
| Skokomish    | -                     |
| Grays Harbor | 1.39                  |
| Willapa Bay  | 1.11                  |
| Siletz       | 1.36                  |
| Coos Bay     | 2.11                  |
| Bandon       | 1.46                  |
| Bolinas      | 0.91                  |
| Petaluma     | -                     |
| Morro Bay    | 1.45                  |
| Newport      | -                     |
| Sweetwater   | -                     |
| Tijuana      | 1.06                  |



**table S4. Elevation range of low, middle, and high marsh zones at each site.** Zone boundaries were defined by degree of flooding by high tides and the lower extent of marsh vegetation at each site.

| Study Site   | Marsh zone | % high tides reaching zone | z* range       | NAVD88 range (m) | MHHW range (m)   | Sample size |
|--------------|------------|----------------------------|----------------|------------------|------------------|-------------|
| Port Susan   | High       | 0.16-25                    | 1.255 to 1.026 | 3.061 to 2.746   | 0.351 to 0.036   | 22          |
|              | Middle     | 25-50                      | 1.025 to 0.871 | 2.745 to 2.532   | 0.035 to -0.178  | 31          |
|              | Low        | >50                        | 0.870 to 0.139 | 2.531 to 1.525   | -0.179 to -1.185 | 155         |
| Nisqually    | High       | 0.16-25                    | 1.255 to 1.026 | 3.585 to 3.154   | 0.479 to 0.048   | 1           |
|              | Middle     | 25-50                      | 1.025 to 0.871 | 3.153 to 2.864   | 0.047 to -0.242  | 82          |
|              | Low        | >50                        | 0.870 to 0.488 | 2.863 to 2.146   | -0.243 to -0.960 | 162         |
| Skokomish    | High       | 0.16-25                    | 1.255 to 1.026 | 3.158 to 2.803   | 0.395 to 0.040   | 30          |
|              | Middle     | 25-50                      | 1.025 to 0.871 | 2.802 to 2.563   | 0.039 to -0.200  | 66          |
|              | Low        | >50                        | 0.870 to 0.163 | 2.562 to 1.467   | -0.201 to -1.296 | 31          |
| Grays Harbor | High       | 0.16-25                    | 1.407 to 1.019 | 2.848 to 2.411   | 0.458 to 0.021   | 164         |
|              | Middle     | 25-50                      | 1.018 to 0.800 | 2.410 to 2.165   | 0.020 to -0.225  | 47          |
|              | Low        | >50                        | 0.799 to 0.297 | 2.164 to 1.599   | -0.226 to -0.791 | 51          |
| Willapa Bay  | High       | 0.16-25                    | 1.407 to 1.019 | 2.839 to 2.265   | 0.602 to 0.028   | 138         |
|              | Middle     | 25-50                      | 1.018 to 0.800 | 2.264 to 1.941   | 0.027 to -0.296  | 61          |
|              | Low        | >50                        | 0.799 to 0.359 | 1.940 to 1.289   | -0.297 to -0.948 | 77          |

|            |        |         |                 |                |                  |     |
|------------|--------|---------|-----------------|----------------|------------------|-----|
|            | High   | 0.16-25 | 1.400 to 1.019  | 2.787 to 2.337 | 0.472 to 0.022   | 72  |
| Siletz     | Middle | 25-50   | 1.018 to 0.801  | 2.336 to 2.080 | 0.021 to -0.235  | 45  |
|            | Low    | >50     | 0.800 to 0.587  | 2.079 to 1.827 | -0.236 to -0.488 | 9   |
|            | High   | 0.16-25 | 1.400 to 1.019  | 2.821 to 2.349 | 0.495 to 0.023   | 13  |
| Coos Bay   | Middle | 25-50   | 1.018 to 0.801  | 2.348 to 2.080 | 0.022 to -0.246  | 150 |
|            | Low    | >50     | 0.800 to 0.364  | 2.079 to 1.539 | -0.247 to -0.787 | 217 |
|            | High   | 0.16-25 | 1.379 to 1.016  | 1.877 to 1.643 | 0.244 to 0.010   | 55  |
| Bolinas    | Middle | 25-50   | 1.016 to 0.748  | 1.643 to 1.471 | 0.010 to -0.162  | 139 |
|            | Low    | >50     | 0.748 to 0.293  | 1.471 to 1.179 | -0.162 to -0.454 | 93  |
|            | High   | 0.16-25 | 1.379 to 1.016  | 2.273 to 1.956 | 0.331 to 0.014   |     |
| Petaluma   | Middle | 25-50   | 1.016 to 0.748  | 1.956 to 1.722 | 0.014 to -0.220  |     |
|            | Low    | >50     | 0.748 to -0.135 | 1.722 to 0.951 | -0.220 to -0.991 |     |
|            | High   | 0.16-25 | 1.379 to 1.016  | 1.949 to 1.665 | 0.297 to 0.013   | 176 |
| Morro Bay  | Middle | 25-50   | 1.016 to 0.748  | 1.665 to 1.454 | 0.013 to -0.198  | 307 |
|            | Low    | >50     | 0.748 to 0.308  | 1.454 to 1.109 | -0.198 to -0.543 | 97  |
|            | High   | 0.16-25 | 1.506 to 1.053  | 2.013 to 1.642 | 0.414 to 0.043   | 62  |
| Newport    | Middle | 25-50   | 1.053 to 0.729  | 1.642 to 1.377 | 0.043 to -0.222  | 123 |
|            | Low    | >50     | 0.729 to -0.164 | 1.377 to 0.646 | -0.222 to -0.953 | 55  |
| Sweetwater | High   | 0.16-25 | 1.506 to 1.053  | 2.048 to 1.663 | 0.430 to 0.045   | 41  |

|         |        |         |                |                |                  |     |
|---------|--------|---------|----------------|----------------|------------------|-----|
|         | Middle | 25-50   | 1.053 to 0.729 | 1.663 to 1.388 | 0.045 to -0.230  | 120 |
|         | Low    | >50     | 0.729 to 0.027 | 1.388 to 0.791 | -0.230 to -0.827 | 81  |
|         | High   | 0.16-25 | 1.506 to 1.053 | 2.112 to 1.708 | 0.451 to 0.047   | 67  |
| Tijuana | Middle | 25-50   | 1.053 to 0.729 | 1.708 to 1.420 | 0.047 to -0.241  | 195 |
|         | Low    | >50     | 0.729 to 0.325 | 1.420 to 1.025 | -0.241 to -0.534 | 26  |

**table S5. List of sediment cores taken from California, with locations, elevations, and estimated sediment accretion rate from  $^{137}\text{Cs}$  dating.**

| Site               | Core Name | Year Sampled | Latitude (dd) | Longitude (dd) | Accretion Rate (mm/yr) | ±   |
|--------------------|-----------|--------------|---------------|----------------|------------------------|-----|
| <b>Bolinas</b>     | BOL13-01  | 2013         | 37.919        | -122.688       | 4.9                    | 0.2 |
| <b>Morro Bay</b>   | MOB13-01  | 2013         | 35.341        | -120.836       | 2.86                   | 0.2 |
| <b>Newport Bay</b> | UNB13-03  | 2013         | 33.651        | -117.881       | 2.6                    | 0.4 |
| <b>Tijuana</b>     | TJE12-07  | 2012         | 32.575        | -117.128       | 3.27                   | 1.2 |

**table S6. WARMER model parameters for Pacific Northwest study sites.**

| <b>Model Parameter</b>                                                         | <b>Port Susan</b> | <b>Skokomish</b> | <b>Nisqually</b> | <b>Grays Harbor</b> | <b>Willapa</b> | <b>Siletz</b> | <b>Coos Bay</b> | <b>Bandon</b> |
|--------------------------------------------------------------------------------|-------------------|------------------|------------------|---------------------|----------------|---------------|-----------------|---------------|
| <b><sup>a</sup>Sediment accumulation rate (g/cm<sup>2</sup>/yr) at 0 MSL</b>   | 0.84              | 0.075            | 0.24             | 1.67                | 1.10           | 0.59          | 0.44            | 0.13          |
| <b><sup>b</sup>Elevation of peak biomass (cm, MSL)</b>                         | 152               | 164              | 175              | 159                 | 163            | 133           | 101             | 123           |
| <b><sup>c</sup>Minimum elevation of vegetation (cm, MSL)</b>                   | -9                | 25               | 105              | 11                  | 40             | 7             | 34              | 12            |
| <b><sup>a</sup>Max. aboveground organic accumulation (g/cm<sup>2</sup>/yr)</b> | 0.0408            | 0.0097           | 0.012            | 0.0677              | 0.0252         | 0.0337        | 0.0051          | 0.0079        |
| <b><sup>d</sup>Root-to-shoot ratio</b>                                         | 1.95              | 1.95             | 1.95             | 1.95                | 1.95           | 1.95          | 1.95            | 1.95          |
| <b><sup>a</sup>Porosity at the surface (percent)</b>                           | 88                | 95               | 94               | 98                  | 92             | 91            | 95              | 89            |
| <b><sup>a</sup>Porosity at depth (percent)</b>                                 | 60                | 72               | 88               | 81                  | 75             | 86            | 84              | 66            |
| <b><sup>a</sup>Refractory carbon (percent)</b>                                 | 43.7              | 61               | 59.7             | 52.5                | 63.4           | 40.9          | 64.5            | 28.1          |
| <b><sup>c</sup>Mean higher high water (cm, MSL)</b>                            | 167               | 147              | 150              | 142                 | 168            | 111           | 103             | 103           |
| <b><sup>c</sup>Maximum astronomical tide (cm, MSL)</b>                         | 253               | 236              | 286              | 200                 | 232            | 180           | 224             | 183           |
| <b><sup>e</sup>Historic sea-level rise (mm/yr)</b>                             | 1.98              | 1.97             | 1.97             | 1.05                | 1.6            | 2.35          | 0.59            | 0.59          |

Data source: <sup>a</sup> soil cores; <sup>b</sup> NAIP imagery and interpolated DEMs; <sup>c</sup> vegetation surveys; <sup>d</sup> literature; <sup>e</sup> nearest NOAA tide station

**table S7. WARMER parameters for California study sites.**

| Model parameter                                                                 | Petaluma | Bolinas | Morro  | Newport | Sweetwater | Tijuana |
|---------------------------------------------------------------------------------|----------|---------|--------|---------|------------|---------|
| <sup>a</sup> Sediment accumulation rate [(g/cm <sup>2</sup> )/yr] at 0 MSL      | 0.10     | 1.05    | 0.15   | 0.25    | 0.18       | 0.19    |
| <sup>b</sup> Elevation of peak biomass (cm, MSL)                                | 73       | 91      | 93     | 92      | 82         | 73.     |
| <sup>c</sup> Minimum elevation of vegetation (cm, MSL)                          | 30       | 21      | 16     | 2       | -2         | 11      |
| <sup>a</sup> Maximum aboveground organic accumulation [(g/cm <sup>2</sup> )/yr] | 0.0157   | 0.0783  | 0.0550 | 0.0338  | 0.007      | 0.0502  |
| <sup>d</sup> Root-to-shoot ratio                                                | 0.458    | 0.458   | 0.458  | 0.458   | 0.458      | 0.458   |
| <sup>a</sup> Porosity at the surface (percent)                                  | 83       | 79      | 90     | 87      | 86         | 87      |
| <sup>a</sup> Porosity at depth (percent)                                        | 80       | 59      | 75     | 38      | 45         | 74      |
| <sup>a</sup> Refractory carbon (percent)                                        | 14       | 26      | 16.7   | 8.9     | 27         | 7.00    |
| <sup>c</sup> Mean higher high water (cm, MSL)                                   | 88       | 64      | 78     | 81      | 85         | 78      |
| <sup>c</sup> Maximum astronomical tide (cm, MSL)                                | 142      | 142     | 133    | 157     | 130        | 136.2   |
| <sup>c</sup> Historical sea-level rise (mm/yr)                                  | 1.89     | 2.10    | 0.79   | 2.22    | 2.06       | 2.06    |

Data source: <sup>a</sup> soil cores; <sup>b</sup> NAIP imagery and interpolated DEMs; <sup>c</sup> vegetation surveys; <sup>d</sup> literature; <sup>e</sup> nearest NOAA tide station
